1 **Title:** Rapid responses of amygdala neurons discriminate facial expressions

2 **Authors:** Mikio Inagaki<sup>1,2</sup> and Ichiro Fujita<sup>1,2,\*</sup>

3

4 **Affiliations:**

5 <sup>1</sup>Laboratory for Cognitive Neuroscience, Graduate School of Frontier Biosciences, Osaka

6 University, 1-4 Yamadaoka, Suita, Osaka 565-0871, Japan

7 <sup>2</sup>Center for Information and Neural Networks, National Institute of Information and

8 Communications Technology and Osaka University, 1-4 Yamadaoka, Suita, Osaka 565-

9 0871, Japan

10

11

12 **\*Corresponding author and lead contact:**

13 Dr. Ichiro Fujita

14 Laboratory for Cognitive Neuroscience

15 Graduate School of Frontier Biosciences, Osaka University

16 1-4 Yamadaoka, Suita, Osaka 565-0871, Japan

17 Tel: +81-6-6879-4439; Fax: +81-6-6879-4439; E-mail: [fujita@fbs.osaka-u.ac.jp](mailto:fujita@fbs.osaka-u.ac.jp)

18

19 **Number of words for Summary:** 246

20 **Number of words for main text:** 3143

21 **Number of figures:** 4

22 **Number of supplemental figures:** 4

23

24

25 **Summary**

26 The amygdala plays a critical role in detecting potential danger through sensory input [1, 2]. In  
27 the primate visual system, a subcortical pathway through the superior colliculus and the pulvinar  
28 is thought to provide the amygdala with rapid and coarse visual information about facial emotions  
29 [3–6]. A recent electrophysiological study in human patients supported this hypothesis by  
30 showing that intracranial event-related potentials discriminated fearful faces from other faces very  
31 quickly (within ~74 ms) [7]. However, several aspects of the hypothesis remain debatable [8].  
32 Critically, evidence for short-latency, emotion-selective responses from individual amygdala  
33 neurons is lacking [9–12], and even if this type of response existed, how it might contribute to  
34 stimulus detection is unclear. Here, we addressed these issues in the monkey amygdala and found  
35 that ensemble responses of single neurons carry robust information about emotional faces—  
36 especially threatening ones—within ~50 ms after stimulus onset. Similar rapid response was not  
37 found in the temporal cortex from which the amygdala receives cortical inputs [13], suggesting a  
38 subcortical origin. Additionally, we found that the rapid amygdala response contained excitatory  
39 and suppressive components. The early excitatory component might be useful for quickly sending  
40 signals to downstream areas. In contrast, the rapid suppressive component sharpened the rising  
41 phase of later, sustained excitatory input (presumably from the temporal cortex) and might  
42 therefore improve processing of emotional faces over time. We thus propose that these two  
43 amygdala responses that originate from the subcortical pathway play dual roles in threat detection.

44

45 **Keywords**

46 subcortical pathway, inferior temporal cortex, emotion, facial expression, face recognition, blind  
47 sight, macaque monkey, linear classifier, suppression

48

## 49 Results and Discussion

50 We recorded extracellular action potentials from face-responsive neurons in the amygdala (mostly  
51 the lateral and basal nuclei; **Figure 1A** and **Figure S1A**) while monkeys were engaged in a  
52 fixation task. Stimuli were nine images of monkey faces, with each of three monkeys providing  
53 three different expressions—aggressive (open-mouth), neutral, and affiliative (pout-lips) [14]  
54 (**Figure 1B**). Because the fastest that monkey pulvinar neurons can respond to faces and face-like  
55 patterns is 30 ms [15], if they exist, early amygdala responses would necessarily occur at a slightly  
56 greater latency. We thus focused exclusively on a 50-ms time window centered at 55 ms after  
57 stimulus onset (the “early window”; 30–80 ms), and found that responses of amygdala neurons  
58 demonstrated marginally differential responses to the facial expressions during this time. The  
59 responses of the two example amygdala neurons shown in **Figure 1C** and **1D** (see also **Figure**  
60 **S1B** and **S1C** for spike waveforms, raster plots, and peri-stimulus time histograms) exhibited  
61 statistically significant differences in firing rate around 55 ms after stimulus onset, which  
62 depended on facial expression (**Figure 1C**: Friedman test,  $n = 10$  trials,  $df = 2$ ,  $\chi^2 = 9.30$ ,  $p =$   
63  $0.0096$ ; **Figure 1D**: Friedman test,  $n = 10$  trials,  $df = 2$ ,  $\chi^2 = 8.16$ ,  $p = 0.017$ ). During this time  
64 period, the neuron in **Figure 1C** responded best to open-mouth faces (the red line is the highest),  
65 while that in **Figure 1D** responded least to open-mouth faces (the red line is the lowest). Across  
66 the 104 amygdala neurons tested, the number of neurons with differential responses to the facial  
67 expressions (Friedman test,  $n \geq 6$  trials,  $p < 0.05$ ) increased slightly around 55 ms after stimulus  
68 onset (**Figure 1E**). To evaluate the statistical significance of this increase, we shuffled the data to  
69 create a null distribution ( $n = 1,000$  simulations) and then determined its 95th and 99th percentiles.  
70 The number of expression-selective neurons was significant at a 0.05 or 0.01 level if it was greater  
71 than these respective values (**Figure 1E**: 0.05, dashed line; 0.01, dotted line). In the early window,  
72 the number surpassed the 0.05 level, indicating that a significant minority of the amygdala  
73 neurons discriminated the facial expressions during this time. Around the 55-ms time point, the  
74 number of selective neurons reached a significance level of 0.05 in several windows, and a

75 significance level of 0.01 in a few windows. The number dropped to a pre-stimulus level for a  
76 few tens of milliseconds and then increased substantially beginning 100 ms after stimulus onset.  
77 Similar results were obtained for a smaller subset of neurons that were judged to be differentially  
78 responsive to the facial expressions with more stringent criteria (Friedman test,  $n \geq 6$  trials,  $p <$   
79  $0.01$  and  $p < 0.005$ ; **Figure S2**), suggesting that early facial-expression signals were carried by a  
80 subset of neurons with highly significant individual responses (such as those shown in **Figure**  
81 **1C**). In contrast, for the 116 temporal cortex neurons recorded from the same animals (**Figure 1A**  
82 and **Figure S1A**), the number of facial-expression selective neurons continuously grew and  
83 surpassed significant levels around 70 ms after stimulus onset, slightly later than the initial  
84 increase, but earlier than the second buildup in the amygdala population (compare **Figure 1E** and  
85 **Figure 1F**).

86

87 Although facial expression selectivity appeared around 55 ms after stimulus onset in a significant  
88 minority of the amygdala neurons, how amygdala neurons as a whole robustly encode facial  
89 expressions with such short latency is unclear. To investigate this issue, we applied a linear  
90 classification approach to population activity [16, 17], which allowed us to evaluate information  
91 about the facial expressions that was encoded by ensembles of amygdala neurons (see **STAR**  
92 **Methods**). This approach assessed how linear hyperplanes discriminated different stimulus  
93 categories (i.e., three facial expressions) within a high dimensional space that was spanned by the  
94 response strength of each neuron (**Figure 2A**). We constructed three classifiers, each for a  
95 different facial expression (**Figure 2B**). Each classifier collected the responses of neurons with  
96 different connection weights and produced a variable (the weighted sum of responses), which  
97 represented the likelihood of an assigned facial expression. We analyzed discrimination  
98 performance of the classifiers as a function of time, using a 50-ms sliding window with 1-ms  
99 steps.

100

101 Linear classifiers constructed for the amygdala were able to read out information about the open-  
102 mouth faces in an early window around 50 ms after stimulus onset. The time course of the overall  
103 performance averaged across the classifiers (**Figure 2C**) revealed a small early peak (filled  
104 arrowhead; window center, 51 ms) as well as a later, global peak (arrow, 163 ms). The two peaks  
105 were separated by a trough (open arrowhead, 84 ms) during which performance dropped to chance  
106 level. At the early peak, performance was higher for the open-mouth and pout-lips classifiers than  
107 for the neutral classifier (**Figure 2D**; Mann–Whitney U test,  $n = 100$  simulations, open-mouth vs.  
108 neutral:  $p = 8.3 \times 10^{-27}$ , pout-lips vs. neutral:  $p = 1.3 \times 10^{-11}$ , Bonferroni correction). We applied  
109 Bonferroni correction in **Figure 2D** and **2F** using the total number of the comparisons ( $n = 9$ ; the  
110 combinations of the three pair-wise comparisons at the three representative windows). Receiver-  
111 operating characteristic (ROC) analysis [18] also indicated that the discrimination of open-mouth  
112 faces occurred at the early time window around 50 ms after stimulus onset (**Figure S3A**). At the  
113 trough and the global peak, performance was higher for the neutral classifier than for the others  
114 (Mann–Whitney U test,  $n = 100$  simulations, neutral vs. open-mouth:  $p = 5.9 \times 10^{-8}$  for trough,  $p$   
115  $= 5.9 \times 10^{-11}$  for global peak, Bonferroni correction; Mann–Whitney U test,  $n = 100$  simulations,  
116 neutral vs. pout-lips:  $p = 7.0 \times 10^{-8}$  for trough,  $p = 4.9 \times 10^{-19}$  for global peak, Bonferroni  
117 correction). Higher performance for the two emotional faces was thus prominent only at the early  
118 peak. Moreover, performance was highest for the open-mouth classifier at the early peak (Mann–  
119 Whitney U test,  $n = 100$  simulations, open-mouth vs. pout-lips:  $p = 1.6 \times 10^{-12}$ , Bonferroni  
120 correction). Brain areas downstream of the amygdala, such as the hypothalamus and midbrain  
121 periaqueductal gray, may rapidly read out information about threat faces, triggering fast  
122 autonomic or hormonal responses, or defensive behaviors.

123

124 In contrast, linear classifiers for neurons in the anterior temporal visual cortex (primarily  
125 cytoarchitectonic area TE, **Figure S1A**) recorded in the same animals did not exhibit better  
126 performance for open-mouth faces (**Figure 2E** and **2F**, see also **Figure S3B** for the result of ROC

127 analysis). In the early window, performance for the open-mouth classifier was comparable with  
128 that of the neutral classifier (Mann–Whitney U test,  $n = 100$  simulations, open-mouth vs. neutral:  
129  $p = 0.28$ , Bonferroni correction), or only slightly better than that of the pout-lips classifier (Mann–  
130 Whitney U test,  $n = 100$  simulations, open-mouth vs. pout-lips:  $p = 0.041$ , Bonferroni correction).  
131 Because visual cortical projections to the amygdala originate exclusively from area TE [13], these  
132 results are consistent with the idea that rapid detection of threat faces in the amygdala is mediated  
133 by signals from the pathway that bypasses visual cortex [3, 4, 19, 20].

134

135 At the trough and the global peak, the neutral classifier performed better than the emotional  
136 classifiers both in the amygdala (**Figure 2D**, middle and right) and temporal cortex (**Figure 2F**,  
137 middle and right). The similar profiles at the later periods suggest that the amygdala and the  
138 temporal cortex may share the results of processing along the ventral cortical pathway.

139

140 The dynamics of the classifier output (weighted sum of responses) indicated that both excitatory  
141 and suppressive responses contributed to the early discrimination of open-mouth faces from the  
142 other faces (**Figure 3A** and **3B**). Neurons with a positive weight contributed to the discrimination  
143 by responding more strongly to the open-mouth faces than to the other faces, while neurons with  
144 a negative weight exhibited weaker responses to the open-mouth faces than to the other faces  
145 (**Figure S4A**). Given this qualitative difference, we divided the amygdala neurons into positive-  
146 weight ( $n = 51$ ) and negative-weight ( $n = 48$ ) groups. We then separately plotted the time course  
147 of their outputs to see how well they discriminated different facial expressions as a function of  
148 time after stimulus onset. Note that one neuron had a zero weight and was excluded from the  
149 analysis. At the early peak (arrowheads in **Figure 3A** and **3B**), the weighted sum was stronger in  
150 response to the open-mouth faces than to the other faces in the positive-weight group (Mann–  
151 Whitney U test,  $n = 100$  simulations, open-mouth vs. neutral:  $p = 1.3 \times 10^{-33}$ , open-mouth vs.  
152 pout-lips:  $p = 1.0 \times 10^{-33}$ , Bonferroni correction) and weaker in the negative-weight group (Mann–

153 Whitney U test,  $n = 100$  simulations, open-mouth vs. neutral:  $p = 7.8 \times 10^{-34}$ , open-mouth vs.  
154 pout-lips:  $p = 7.8 \times 10^{-34}$ , Bonferroni correction). In **Figure 3A** and **3B**, we used Bonferroni  
155 correction ( $n = 3$ ) based on the three pair-wise comparisons at the early peak. The weighted sum  
156 in response to the open-mouth faces at the early peak was stronger than pre-stimulus levels  
157 (excitation) in the positive-weight group (Mann–Whitney U test,  $n = 100$  simulations, 51-ms  
158 window vs. 1-ms window:  $p = 2.1 \times 10^{-31}$ , Bonferroni correction) and weaker (suppression) in the  
159 negative-weight group (Mann–Whitney U test,  $n = 100$  simulations, 51-ms window vs. 1-ms  
160 window:  $p = 1.7 \times 10^{-33}$ , Bonferroni correction) (see **Figure S4B** for single neuron correlation  
161 between the sign of the weight and the sign of the early response). Thus, both excitation and  
162 suppression in the amygdala contributed to the early discrimination of open-mouth faces by its  
163 neuronal population.

164

165 An analysis of spatial frequency (SF) selectivity suggested that early excitation and suppression  
166 might have different roles in detecting open-mouth faces (**Figure 3C–3E**). We previously  
167 examined reference frames for SF in face-responsive neurons by testing the effects of stimulus  
168 size on SF selectivity (**Figure 3C**) [14]. We showed that a population of amygdala neurons has  
169 retina-based SF (cycles/degree) tuning that is predicted by the limited SF bandwidth of the  
170 subcortical pathway [21]. Other populations have image-based SF (cycles/image) tuning that  
171 requires broad SF bandwidth, which is a common property of the temporal cortex neurons [14].  
172 Retina-based SF tuning is possibly related to social distance computation [22] because the tuning  
173 retains sensitivity to stimulus size (**Figure 3D**, upper panel), and hence viewing distance. Image-  
174 based SF tuning (**Figure 3D**, lower panel) is consistent with size-independent performance for  
175 recognizing spatially filtered faces in human observers [23, 24]. For the amygdala open-mouth  
176 classifier, weight strength at the early peak correlated with the SF-tuning type across neurons  
177 (retina-based vs. image-based, characterized by shift index; see **STAR Methods**) (Spearman’s  
178 rank correlation,  $n = 35$ ,  $r_s = 0.48$ ,  $p = 0.0036$ ; **Figure 3E**). The positive-weight neurons (early

179 excitation type) tended to have retina-based SF tuning and the negative-weight neurons (early  
180 suppression type) had image-based SF tuning. This trend was not observed in the temporal cortex  
181 population (51 ms, open-mouth classifier,  $n = 37$ ,  $r_s = 0.037$ ,  $p = 0.83$ ) or at the global peak within  
182 the amygdala population (163 ms, open-mouth classifier,  $n = 35$ ,  $r_s = 0.24$ ,  $p = 0.16$ ).

183

184 Because of its link with retina-based SF tuning, the early excitation that we observed in some  
185 amygdala neurons is likely mediated by subcortical processing. Supporting this is the dissimilarity  
186 in performance profiles for the amygdala and temporal cortex at the early peak (**Figure 2D** and  
187 **2F**). Thus, even if fast signals from the temporal cortex exist, they likely provide only a minor  
188 contribution to early discriminatory signals in the amygdala. Rapid subcortical processing might  
189 send threat-face information further downstream (**Figure 4**). Assuming local inhibition within the  
190 amygdala [25], the fast subcortical processing could initiate early suppression of another group  
191 of amygdala neurons. If so, the link between early suppression and the temporal cortex-like  
192 property (i.e., image-based SF tuning) that we found suggests a convergence of subcortical and  
193 cortical processing in single amygdala neurons with a time delay (**Figure 4**). Slower sustained  
194 excitatory responses (most likely corresponding to cortical inputs) rebound from the suppression  
195 and sharply rise in their response time course (**Figure 3B**, red line). We speculate that this  
196 potentially improves detection of facial information by downstream areas because of the enhanced  
197 temporal contrast [26].

198

199 Our results, based on single-neuron responses in the amygdala and the temporal visual cortex to  
200 the same stimuli in the same animals, thus provide strong evidence for a rapid, subcortically  
201 mediated response of amygdala neurons to emotional faces that is independent from cortical input  
202 via visual areas in the temporal cortex. Although we used a relatively small stimulus set (e.g., no  
203 appealing “grimace” faces) that may result in an underestimation of the neural selectivity for  
204 facial expressions, and repeated presentations of the same fixed set to the monkeys that may lead



205 habituation [7], we found rapid discrimination of facial expressions by amygdala neurons, which  
206 has not been observed in previous studies [9–12]. Our success in detecting this rapid response  
207 might be related to the choice of a proper time window for analysis (50 ms), given the dynamics  
208 of the selectivity profiles in the amygdala (compare the profiles at different time windows in  
209 **Figure 2D**). The 50-ms window avoids merging the heterogeneous profiles along the time axis,  
210 while it gains statistical power by virtue of temporal averaging.

211

212 In LeDoux’s [20] original proposal, fast threat detection by the primate amygdala may be  
213 inaccurate at times because the tradeoff between speed and accuracy in visual processing favors  
214 speed (e.g., quick detection of a snake-like object is more important than accurately  
215 discriminating real snakes from snake-like ropes). Here, we demonstrated the speed of threat  
216 detection by the amygdala, but not its accuracy. Clarifying the accuracy and its relation to the  
217 speed requires further studies that analyze the detailed selectivity of face-responsive neurons  
218 during the early time window.

219

220 Finally, we propose a new ‘dual-roles’ model by incorporating local inhibitory interaction within  
221 the amygdala into the original ‘dual-route’ model. The temporal asynchrony of the subcortical  
222 and cortical processing, in addition to the transmission speed within the subcortical route, may be  
223 a key for achieving reliable threat detection.

224

225 **Author Contributions:**

226 M.I. and I.F. designed the experiments. M.I. collected and analyzed the data. M.I. and I.F. wrote  
227 the paper.

228

229 **Acknowledgments:**

230 This work was supported by grants to I.F. from the Ministry of Education, Culture, Science, Sports  
231 and Technology (JP15H01437, JP16H01673), the Japan Science and Technology Agency (Core  
232 Research for Evolutional Science and Technology), Center for Information and Neural Networks,  
233 and R & D for Computing Platform Inspired by Human Brain Cognition. We thank Yasuko  
234 Sugase-Miyamoto, Hiroshi Ban, Ueli Rutishauser, and Ralph Adolphs for comments on the  
235 manuscript, and Keisuke Kunizawa and Takayuki Wakatsuchi for help in collecting the data.  
236 Magnetic resonance images were taken at the National Institute for Physiological Sciences,  
237 Okazaki, Japan. The authors declare no competing financial interests.

238

239 **References:**

- 240 1. Klüver, H., and Bucy, P.C. (1939). Preliminary analysis of functions of the temporal lobes in  
241 monkeys. *Arch. Neurol. Psychiatry* 42, 979–1000.
- 242 2. LeDoux, J.E. (2000). Emotional circuits in the brain. *Annu. Rev. Neurosci.* 23, 155–184.
- 243 3. Morris, J.S., DeGelder, B., Weiskrantz, L., and Dolan, R.J. (2001). Differential  
244 extrageniculostriate and amygdala responses to presentation of emotional faces in a cortically  
245 blind field. *Brain* 124, 1241–1252.
- 246 4. Pegna, A.J., Khateb, A., Lazeyras, F., and Seghier, M.L. (2004). Discriminating emotional  
247 faces without primary visual cortices involves the right amygdala. *Nat. Neurosci.* 8, 24–25.
- 248 5. Johnson, M.H. (2005). Subcortical face processing. *Nat. Rev. Neurosci.* 6, 766–774.
- 249 6. Tamietto, M., and de Gelder, B. (2010). Neural bases of the non-conscious perception of  
250 emotional signals. *Nat. Rev. Neurosci.* 11, 697–709.

- 251 7. Méndez-Bértolo, C., Moratti, S., Toledano, R., Lopez-Sosa, F., Martínez-Alvarez, R., Mah,  
252 Y.H., Vuilleumier, P., Gil-Nagel, A., Strange, B.A. (2016). A fast pathway for fear in human  
253 amygdala. *Nat. Neurosci.* *19*, 1041–1049.
- 254 8. Pessoa, L., and Adolphs, R. (2010). Emotion processing and the amygdala: from a 'low road'  
255 to 'many roads' of evaluating biological significance. *Nat. Rev. Neurosci.* *11*, 773–782.
- 256 9. Kuraoka, K., and Nakamura, K. (2006). Impacts of facial identity and type of emotion on  
257 responses of amygdala neurons. *Neuroreport.* *17*, 9–12.
- 258 10. Gothard, K.M., Battaglia, F.P., Erickson, C.A., Spitler, K.M., and Amaral, D.G. (2007).  
259 Neural responses to facial expression and face identity in the monkey amygdala. *J.*  
260 *Neurophysiol.* *97*, 1671–1683.
- 261 11. Mormann, F., Kornblith, S., Quiroga, A., Kraskov, A., Cerf, M., Fried, I., Koch, C. (2008).  
262 Latency and selectivity of single neurons indicate hierarchical processing in the human  
263 medial temporal lobe. *J. Neurosci.* *28*, 8865–8872.
- 264 12. Rutishauser, U., Tudusciuc, O., Neumann, D., Mamelak, A.N., Heller, A.C., Ross, I.B.,  
265 Philpott, L., Sutherling, W.W., Adolphs, R. (2011). Single-unit responses selective for whole  
266 faces in the human amygdala. *Curr. Biol.* *21*, 1654–1660.
- 267 13. Aggleton, J.P., Burton, M.J., and Passingham, R.E. (1980). Cortical and subcortical afferents  
268 to the amygdala of the rhesus monkey (*Macaca mulatta*). *Brain Res.* *190*, 347–368.
- 269 14. Inagaki, M., and Fujita, I. (2011). Reference frames for spatial frequency in face  
270 representation differ in the temporal visual cortex and amygdala. *J. Neurosci.* *31*, 10371–  
271 10379.
- 272 15. Nguyen, M.N., Hori, E., Matsumoto, J., Tran, A.H., Ono, T., Nishijo, H. (2013). Neuronal  
273 responses to face-like stimuli in the monkey pulvinar. *Eur. J. Neurosci.* *37*, 35–51.
- 274 16. Hung, C.P., Kreiman, G., Poggio, T., and DiCarlo, J.J. (2005). Fast readout of object identity  
275 from macaque inferior temporal cortex. *Science* *310*, 863–866.
- 276 17. Rust, N.C., and DiCarlo, J.J. (2010). Selectivity and tolerance ("invariance") both increase as

- 277 visual information propagates from cortical area V4 to IT. *J. Neurosci.* *30*, 12978–12995.
- 278 18. Green, D.M., and Swets, J.A. (1966). *Signal detection theory and psychophysics* (New York:  
279 Wiley).
- 280 19. Vuilleumier, P. (2005). How brains beware: neural mechanisms of emotional attention. *Trends*  
281 *Cogn Sci.* *9*, 585–594.
- 282 20. LeDoux, J.E. (1996). *The Emotional Brain* (New York: Simon & Schuster).
- 283 21. Vuilleumier, P., Armony, J.L., Driver, J., and Dolan, R.J. (2003). Distinct spatial frequency  
284 sensitivities for processing faces and emotional expressions. *Nat. Neurosci.* *6*, 624–631.
- 285 22. Kennedy, D.P., Gläscher, J., Tyszka, J.M., and Adolphs, R. (2009). Personal space regulation  
286 by the human amygdala. *Nat. Neurosci.* *12*, 1226–1227.
- 287 23. Hayes, T., Morrone, M.C., and Burr, D.C. (1986). Recognition of positive and negative  
288 bandpass-filtered images. *Perception.* *15*, 595–602.
- 289 24. Näsänen, R. (1999). Spatial frequency bandwidth used in the recognition of facial images.  
290 *Vision Res.* *39*, 3824–3833.
- 291 25. Ehrlich, I., Humeau, Y., Grenier, F., Ciocchi, S., Herry, C., and Lüthi, A. (2009). Amygdala  
292 inhibitory circuits and the control of fear memory. *Neuron.* *62*, 757–771.
- 293 26. Lee, J., Kim, K., Chung, S., and Lee, C. (2013). Suppression of spontaneous activity before  
294 visual response in the primate V1 neurons during a visually guided saccade task. *J. Neurosci.*  
295 *33*, 3760–3764.
- 296 27. Van Hooff, J.A.R.A.M. (1967). The facial displays of the catarrhine monkeys and apes. In  
297 *Primate Ethology*, D. Morris, ed. (Chicago: Aldine), pp. 7–68.
- 298 28. Chang, C.C., and Lin, C.J. (2011). LIBSVM: a library for support vector machines. *A.C.M.*  
299 *Trans. Intell. Syst. Technol.* *2*, 27:1–27:27.
- 300 29. Miller, M., Pasik, P., Pasik, T. (1980). Extrageniculostriate vision in the monkey. VII. Contrast  
301 sensitivity functions. *J. Neurophysiol.* *43*, 1510–1526.

302 **Figure Legends**

303 **Figure 1. Selectivity for facial expression in individual neurons.** (A) Recording sites. A coronal  
304 section of a magnetic resonance image at A23 in monkey S. We recorded from the amygdala  
305 (orange circles) and the temporal visual cortex (purple circles). See **Figure S1A** for histological  
306 verification. (B) Visual stimuli. The stimulus set consisted of nine face images with three different  
307 facial expressions (open-mouth ‘threat’, neutral, pout-lips) displayed by three different monkeys.  
308 (C and D) Time course of responses for different facial expressions in two examples of amygdala  
309 neurons (mean  $\pm$  SEM, 50-ms sliding window). Dashed lines represent the mean firing rate  
310 immediately before stimulus presentation (-50 to 0 ms). The early window (30-80 ms) is indicated  
311 by the filled arrowhead. (E and F) Time course of the number of facial-expression selective cells  
312 (Friedman test,  $p < 0.05$ , 50-ms sliding window) in the amygdala (E) and temporal cortex (F).  
313 Dashed and dotted lines represent 95 and 99 percentiles of the null distribution made by shuffling  
314 the data, respectively. The early window (30-80 ms) is indicated by the filled arrowhead.

315

316 **Figure 2. Population discriminability assessed by linear classification.** (A) Discriminability  
317 of facial expressions by population responses. Each symbol indicates the response of a population  
318 of neurons to a given image in a given trial, and different symbol types denote responses to  
319 different facial expressions. A linear hyperplane (dotted line) that effectively separates a response  
320 cluster from the others was determined for each facial expression by a support vector-machine  
321 procedure (see **STAR Methods**). (B) Implementation of classifiers based on the weighted sum of  
322 responses. The linear hyperplane in (A) is defined by weights on each axis (determining the  
323 hyperplane orientation) and an offset from the origin. The weights are zero, positive, or negative.  
324 The final decision is made by selecting the classifier with the largest output. (C) Time course of  
325 discrimination performance for the amygdala population. Average performance across 100  
326 repetitions is plotted along the time axis. The gray line represents chance performance estimated  
327 by shuffling the data. Representative time windows are indicated by the filled arrowhead (early

328 peak), open arrowhead (trough), and arrow (global peak). **(D)** Performance profiles of the  
329 amygdala population at the representative windows. Performance accuracy (mean  $\pm$  SEM across  
330 100 repetitions) is plotted for the open-mouth (O), neutral (N), and pout-lips (P) faces. Gray lines  
331 indicate chance level estimated by shuffling the data. \*, Mann–Whitney U test,  $p < 0.05$ ,  
332 Bonferroni correction; \*\*, Mann–Whitney U test,  $p < 0.01$ , Bonferroni correction. **(E and F)** Time  
333 course and profiles for discrimination performance in the temporal cortex population.  
334 Conventions are the same as in **C** and **D**.

335

336 **Figure 3. Performance of the open-mouth classifier constructed for the amygdala**  
337 **population at the early peak.** **(A and B)** Time course for the weighted sum of responses across  
338 amygdala neurons having positive **(A)** and negative weights **(B)**. One neuron had a weight of 0  
339 and was excluded from the analysis. The weighted sums were averaged across 100 repetitions.  
340 SEMs are shaded, but are too small to visualize. **(C)** Visual stimuli for testing the effects of  
341 stimulus size on spatial frequency (SF) tuning. A stimulus set consisted of 35 images (all  
342 combinations of 7 SFs and 5 sizes; for details, see **STAR Methods**) in actual experiments. **(D)**  
343 SF tuning curves of neurons ideally tuned for retina-based SF (cycles/degree) (upper panel, shift  
344 index = 1) and for image-based SF (cycles/image) (lower panel, shift index = 0). Shift index was  
345 calculated from the effects of stimulus size on SF tuning and thus represents SF-tuning type (for  
346 details, see **STAR Methods**). **(E)** Relationship between weight strength and shift index. Mean  
347 values across 100 repetitions are plotted for weight strength.

348

349 **Figure 4. The dual-roles model for processing threat faces.** Early excitation through the  
350 subcortical pathway in a group of amygdala neurons mediates rapid signaling of threats. Early  
351 suppression in another group of neurons that originates from the subcortical pathway and is  
352 mediated by local inhibition enhances late-arriving excitatory inputs from the cortical pathway  
353 via temporal contrast.

354

355 **STAR METHODS**

356 **Contact for reagent and resource sharing**

357 Further information and requests for resources and reagents should be directed to and will be  
358 fulfilled by the Lead Contact, Ichiro Fujita ([fujita@fbs.osaka-u.ac.jp](mailto:fujita@fbs.osaka-u.ac.jp)).

359

360 **Experimental model and subject details**

361 We used two adult Japanese monkeys (*Macaca fuscata*; monkey S, male, 9 kg; monkey K, female,  
362 7 kg). All animal care and experimental procedures were approved by the Animal Experiment  
363 Committee of Osaka University in compliance with *the National Institutes of Health Guide for*  
364 *the Care and Use of Laboratory Animals* [DHEW Publication No. (NIH) 85-234, Revised 1996,  
365 Office of Science and Health Reports. DRR/NIH, Bethesda, MD 20205].

366

367 **Method details**

368 *Surgery*

369 A head holder and a recording chamber were attached to each monkey with the aid of magnetic  
370 resonance images for positioning. To record from the amygdala and temporal cortex, the chamber  
371 was centered at 20 or 21 mm anterior and 10 mm lateral to the ear canals with a 10° lateral tilt  
372 relative to the midline. All surgical procedures were performed under anesthesia with isoflurane  
373 (Forane, Abbott, Tokyo, Japan, 1–3%; in 70% N<sub>2</sub>O and 30% O<sub>2</sub>) and aseptic conditions. Local  
374 anesthesia was applied with lidocaine (2% Xylocaine; AstraZeneca, Osaka, Japan) as needed.  
375 Arterial oxygen-saturation level, body temperature, heart rate, and an electrocardiogram were  
376 continuously monitored. Monkeys were treated with an antibiotic (Pentacilin, 40 mg/kg, i.m.;  
377 Toyama Chemical, Tokyo, Japan), an anti-inflammatory/analgesic agent (Voltaren, 1 mg/kg,  
378 Novartis Pharma, Tokyo, Japan; or Menamin, 0.8 mg/kg i.m., Chugai, Tokyo, Japan), and a  
379 corticosteroid (Decadron, 0.1 mg/kg i.m., MSD, Tokyo, Japan) for the first postoperative week.

380 After a recovery period (more than 2 weeks), we started to train the monkeys on a fixation task  
381 (see below).

382

383 *Visual stimuli and task*

384 Nine images of three monkeys, each displaying three different facial expressions (open-mouth,  
385 neutral, pout-lips), were used as face stimuli (**Figure 1B**). Open-mouth is an aggressive  
386 expression and pout-lips is an affiliative expression [27]. After isolating faces from body features  
387 and background scenes, the mean luminance and two-dimensional amplitude spectrum were  
388 equalized across the face images to minimize differences in low-level visual features [14]. Visual  
389 stimuli were presented on a Gamma-corrected CRT monitor (HM903D-A, Iiyama, Tokyo, Japan;  
390 screen size,  $32.8^\circ \times 25.5^\circ$  in visual angle; resolution, 1600 pixels  $\times$  1200 pixels; refresh rate, 85  
391 Hz) with an OpenGL program running on a PC (Precision 330, Dell, Kawasaki, Japan).  
392 Luminance ranged from 0.02 cd/m<sup>2</sup> to 46 cd/m<sup>2</sup>, and the background luminance was 22 cd/m<sup>2</sup>.  
393 All face images were sized  $7.7^\circ \times 7.7^\circ$  on the monitor. For each neuron tested, we presented the  
394 face images to the monkeys at least 6 times in a pseudo-random order (mean: 9.9 times). Although  
395 monkeys were able to expect the timing of stimulus appearance, they were not able to expect  
396 which face image would appear in the upcoming trial.

397

398 During recording experiments, the monkeys performed a fixation task while sitting in a primate  
399 chair. After the monkeys fixated a small dot ( $0.18^\circ \times 0.18^\circ$ ) at the center of the screen for 500 ms,  
400 a face image was presented for 500 ms at the center of the screen. The monkeys obtained liquid  
401 reward for maintaining fixation within the fixation window throughout the trial. If the monkeys  
402 failed to maintain fixation, the trial was terminated without any reward and the data were  
403 discarded. The inter-trial interval was at least 500 ms. Gaze direction was monitored with an  
404 infrared camera system. The size of the fixation window was  $2^\circ \times 2^\circ$  for monkey S and  $3.5^\circ \times$   
405  $3.5^\circ$  for monkey K.



406

407 *Electrophysiology*

408 We used stainless steel guide tubes and tungsten electrodes (0.2–2.0 M $\Omega$  at 1 kHz; Fredrick-Haer,  
409 Bowdoin, ME) for recording extracellular single-neuron (unit) activity. After penetrating the dura  
410 mater with the aid of a guide tube, an electrode was inserted into the brain through the guide tube.  
411 The tip of the guide tube was positioned at approximately 10 mm above the recording sites. The  
412 voltage signals were amplified ( $\times 10,000$ ) and filtered (band pass: 500 Hz to 3 kHz) by an  
413 amplifier (MEG-6116, Nihon Kohden, Tokyo, Japan) and stored on a computer (sampling rate:  
414 20 kHz) for off-line spike sorting. All results shown in this paper are based on data from off-line  
415 spike sorting: spikes were extracted using the template-matching method and then classified into  
416 unit(s) based on their amplitude. For on-line monitoring, we isolated extracellular action  
417 potentials with a spike-sorting system (Multi Spike Detector, Alpha-Omega, Nazareth, Israel).  
418 We maintained the spike amplitude of target neurons higher than that of other units as well as  
419 higher than the noise levels by continuously adjusting the electrode position with the aid of an  
420 electrode manipulator (MO95, Narishige, Tokyo, Japan) throughout the recording session. This  
421 helped us to clearly classify target neurons in later off-line analysis.

422

423 *Data analysis*

424 We recorded from 104 and 116 face-responsive neurons in the amygdala (77 from monkey S, 27  
425 from monkey K) and temporal cortex (68 from monkey S, 48 from monkey K), respectively. Face  
426 responsiveness was determined by comparing the firing rate during the 500 ms before stimulus  
427 onset with that during the 500 ms after stimulus onset. Neurons were considered face responsive  
428 if at least one of the nine face images elicited a significant increase in activity (two-sided  
429 Wilcoxon signed-rank test,  $p < 0.05$ ).

430

431 We first tested the statistical significance of selectivity for facial expressions (Friedman test, main  
432 factor: facial expression) in a 50-ms time window centered at 55 ms after stimulus onset (the  
433 “early window”; 30–80 ms). Because the shortest response latency of pulvinar neurons to faces  
434 and face-like patterns is 30 ms [15], we focused on this specific time window. Across the  
435 population of recorded cells, we counted the number of facial-expression selective cells (criterion:  
436  $p < 0.05$ ). To estimate false positives, we made a null distribution of the number of selective  
437 neurons by shuffling the stimulus-response relationships (1,000 repetitions). This determined the  
438 95 and 99 percentiles of the null distribution, allowing false positive estimation at  $p = 0.05$  and  $p$   
439  $= 0.01$  statistical criteria.

440

441 We then examined the time-course of the selectivity for facial expression using a 50-ms sliding  
442 time window for each individual neuron. We moved the window at 1-ms increments and tested  
443 the statistical significance of the selectivity with the Friedman test (main factor: facial expression).  
444 This yielded a time course of the  $p$  value for the effect of facial expression. We counted the number  
445 of facial-expression selective cells (criterion:  $p < 0.05$ ) at each point in time (**Figure 1C–1F**). We  
446 estimated false positives at  $p = 0.05$  and  $p = 0.01$  statistical criteria from the null distribution made  
447 by shuffling the stimulus-response relationships (1,000 repetitions) as described above. Because  
448 no systematic changes were present in the false positive estimations along the time course, we  
449 merged and averaged the percentile values across time windows. Additionally, we performed the  
450 same Friedman test analysis with more conservative criterion of  $p < 0.01$  and  $p < 0.005$  in **Figure**  
451 **S2**.

452

453 We quantified the degree to which the response distributions differed across the facial expressions  
454 with a receiver-operating characteristic (ROC) analysis [18]. ROC analysis produces a metric  
455 called the area under the curve (AUC) that represents the degree of separation between  
456 distributions (e.g., 0.5, totally overlapped; 1.0, perfectly separated). Note that AUC values smaller

457 than 0.5 were converted to values greater than 0.5 by reflecting the values with respect to 0.5 (e.g.,  
458 an AUC value of 0.45 was converted to 0.55). We performed this analysis with a one-versus-rest  
459 style (e.g., open-mouth vs. the other faces) using a 50-ms time window (**Figure S3**).

460

461 We applied a linear classification approach [16, 17] to the population activity of the amygdala  
462 and the temporal cortex to assess how well they discriminated the facial expressions. This  
463 approach constructs multiple classifiers, each for a different stimulus category (the three different  
464 facial expressions). Each classifier has a set of weight parameters that determines the contribution  
465 of individual neurons. During training, the classifiers are optimized to discriminate the three facial  
466 expressions by adjusting the weights. After training, for a given image, each classifier  
467 independently computes a weighted sum of responses to the image for individual neurons. At the  
468 decision stage, the classifier with the largest weighted sum is chosen as the category prediction  
469 for the image. All neurons, even those that are not statistically selective for facial expressions,  
470 can contribute to discrimination performance at varying strengths. We used a sliding time window  
471 (50-ms width, 1-ms step) to examine the time course of the discrimination performance. For cross-  
472 validation purposes (see below), we needed a set of the responses for 10 trial repetitions. Among  
473 all face-responsive neurons, 100 amygdala neurons and 113 temporal cortex neurons met this  
474 criterion and were subjected to the analysis.

475

476 For each time window, we independently made different sets of classifiers. To implement them  
477 for a particular time window, we first counted the number of spikes in the time window for a  
478 given trial for each neuron, and produced an array of spike counts for a population of neurons  
479 (response vector). For each stimulus, the response vector  $\mathbf{x}$  can be plotted as a single point in a  
480 high-dimensional space, in which each axis represents the response strength of different neurons  
481 (**Figure 2A**). The spike counts were separately normalized within each neuron (the maximum  
482 response was set to 1; e.g., actual spike counts of [0, 1, 2, 3, 4] became response vector of [0, 0.25,

483 0.5, 0.75, 1]) to compensate for differences in firing rates across neurons. For other trials using  
484 the same stimulus, additional data points were plotted near the first one with some fluctuations.  
485 Likewise, other clusters might appear for other stimuli. Then, we searched for a linear hyperplane  
486 that separated the set of clusters corresponding to a particular facial expression from those  
487 corresponding to the others (one-versus-rest classification). The computation of a linear classifier  
488 took the following form:

489

490

$$f(\mathbf{x}) = \mathbf{w}^T \mathbf{x} + b$$

491

492 where  $\mathbf{x}$  is a response vector,  $\mathbf{w}$  is a weight vector that defines the hyperplane, and  $b$  is the offset  
493 of the hyperplane from the origin. We applied a support vector-machine procedure to determine  
494 the weight vector and the offset so that distances between the hyperplane and its nearest data  
495 points were maximized. We used the LIBSVM library [28] to search for the optimal parameters.  
496 The settings of the library were a linear kernel, the C-SVC algorithm, and a cost parameter of  
497 0.125. We employed a portion of the neuronal data (8 out of 10 trials) for this training. Thus, a  
498 total of 72 samples (8 trials  $\times$  9 face images) of the response vector were used to determine the  
499 parameters. The remaining 18 samples (2 trials  $\times$  9 face images) were used to test classification  
500 performance (the 5-fold cross validation, see below).

501

502 After training different classifiers for each different facial expression, we assessed performance  
503 of the classifiers as a whole using the unused part of the neuronal data. For each classifier (open-  
504 mouth, neutral, and pout-lips), a weighted sum was separately computed for a response vector of  
505 a particular sample. After adding an offset, a positive/negative weighted sum indicated that the  
506 data point was inside/outside the hyperplane in the high-dimensional response space. A large  
507 weighted sum was computed for data points that were far from the hyperplane (i.e., a large  
508 positive value corresponded to robustly correct classification). Thus, the weighted sums were

509 compared and the classifier with the largest output was chosen as the answer for the population.  
510 Performance was assessed by calculating the proportion of correct answers across the 18 samples  
511 for cross-validation. To determine the temporal evolution of the performance, we repeated this  
512 procedure along the time axis by moving a 50-ms time window. Note that the performance does  
513 not reflect the effects of response covariation in the neurons (noise correlation) because the  
514 neuronal responses were not simultaneously recorded.

515

516 We equalized the number of neurons used for the classification between the two areas because a  
517 greater number generally results in higher performance [17]. In a single simulation, all 100  
518 amygdala neurons were used, and 100 neurons were randomly selected from the 113 temporal  
519 cortex neurons. We repeated this simulation 100 times and the 100 samples were used for  
520 statistical tests (comparisons of correct rates, weighted sums). Chance levels of performance were  
521 estimated with null distributions made by shuffling the stimulus-response relationships.

522

523 For a subset of amygdala neurons ( $n = 35$ ), we tested effects of stimulus size on neuronal tuning  
524 for image-based spatial frequency (SF) by presenting a series of bandpass-filtered faces (center  
525 SF: 2.0, 2.8, 4.0, 5.7, 8.0, 11.3, 16.0 cycles/image) with different sizes ( $3.8^\circ \times 3.8^\circ$ ,  $5.4^\circ \times 5.4^\circ$ ,  
526  $7.7^\circ \times 7.7^\circ$ ,  $11.0^\circ \times 11.0^\circ$ ,  $15.3^\circ \times 15.3^\circ$ ). Details of the analysis are described in our previous  
527 paper [14]. In short, we exploited the difference in SF bandwidth between the subcortical and  
528 cortical pathways [21, 29] and evaluated the relative contribution of the two pathways to the  
529 responses. We calculated a shift index from SF tuning curves at different stimulus sizes to  
530 characterize how the preferred image-based SF (cycles/image) changes across stimulus sizes.  
531 When the shift index is 0, the preferred image-based SF does not change across stimulus sizes  
532 (i.e., ideally tuned for image-based SFs). When the shift index is 1, the preferred image-based SF  
533 changes so as to be proportional to the stimulus size. Because dividing image-based SF  
534 (cycles/image) by stimulus size (degrees) produces retina-based SF (cycles/degree), a shift index

535 of 1 means that the preferred retina-based SF does not change across stimulus size (i.e., ideally  
536 tuned for retina-based SFs).

537

### 538 *Histology*

539 We performed histological analysis in monkey S to verify the recording sites in the temporal  
540 cortex and amygdala. After making micro lesions using an electric current (10  $\mu$ A, 10 s or 20 s,  
541 electrode negative) in these areas, the monkey was deeply anesthetized with an overdose of  
542 sodium pentobarbital (100 mg/kg, i.p.) and transcardially perfused with 4% paraformaldehyde.  
543 The brain was immersed in a graded series of sucrose solutions (10%–30%), frozen, and cut into  
544 80- $\mu$ m coronal sections. The sections were stained for Nissl substance with cresyl violet.  
545 Recording sites were reconstructed using the position of the lesions (for photomicrographs, see  
546 [14]) and the readings of the electrode manipulator.

547

### 548 **Quantification and statistical analysis**

549 We used non-parametric statistical tests (two-sided Wilcoxon signed-rank test, two-sided Mann–  
550 Whitney U test, Friedman test, and Spearman’s rank correlation) to examine significance of the  
551 data. Error bars and shaded areas denote standard errors of the mean (SEMs). We made null  
552 distributions of the data by shuffling the stimulus-response relationships (1,000 repetitions) and  
553 estimated confidence intervals of the null distributions.

554

### 555 **Data and software availability**

556 We performed all analyses in MATLAB (MathWorks, Natick, MA). The LIBSVM library is  
557 available at <http://www.csie.ntu.edu.tw/~cjlin/libsvm>.

558

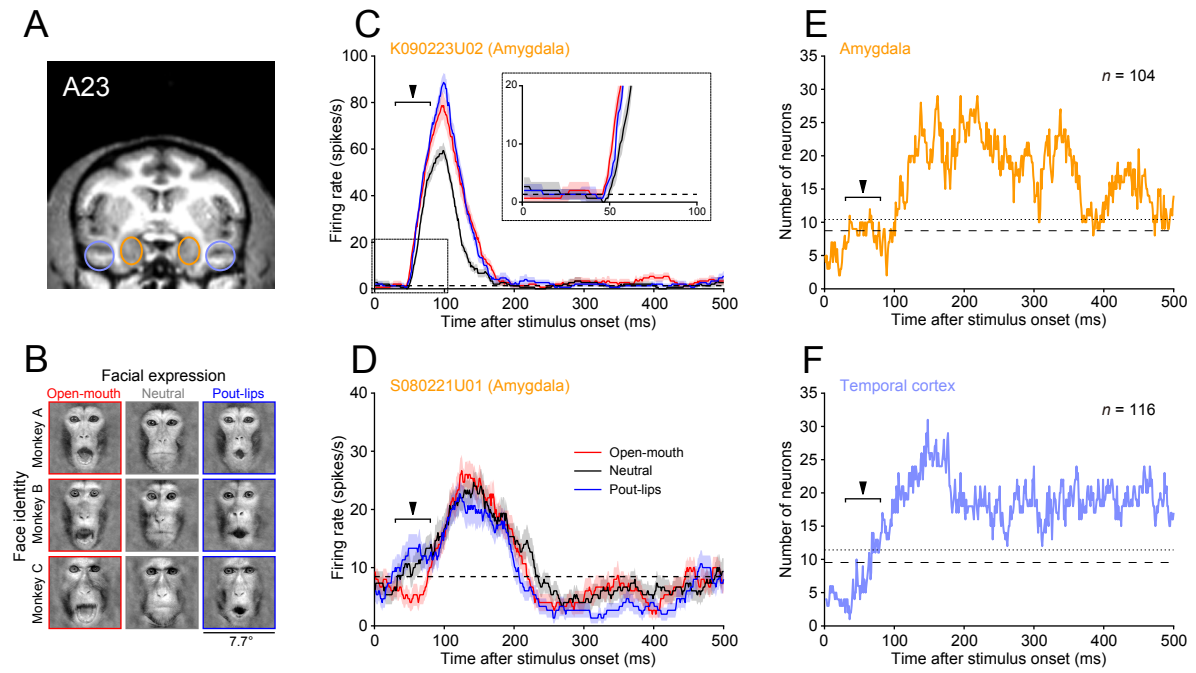

Inagaki & Fujita  
Figure 1

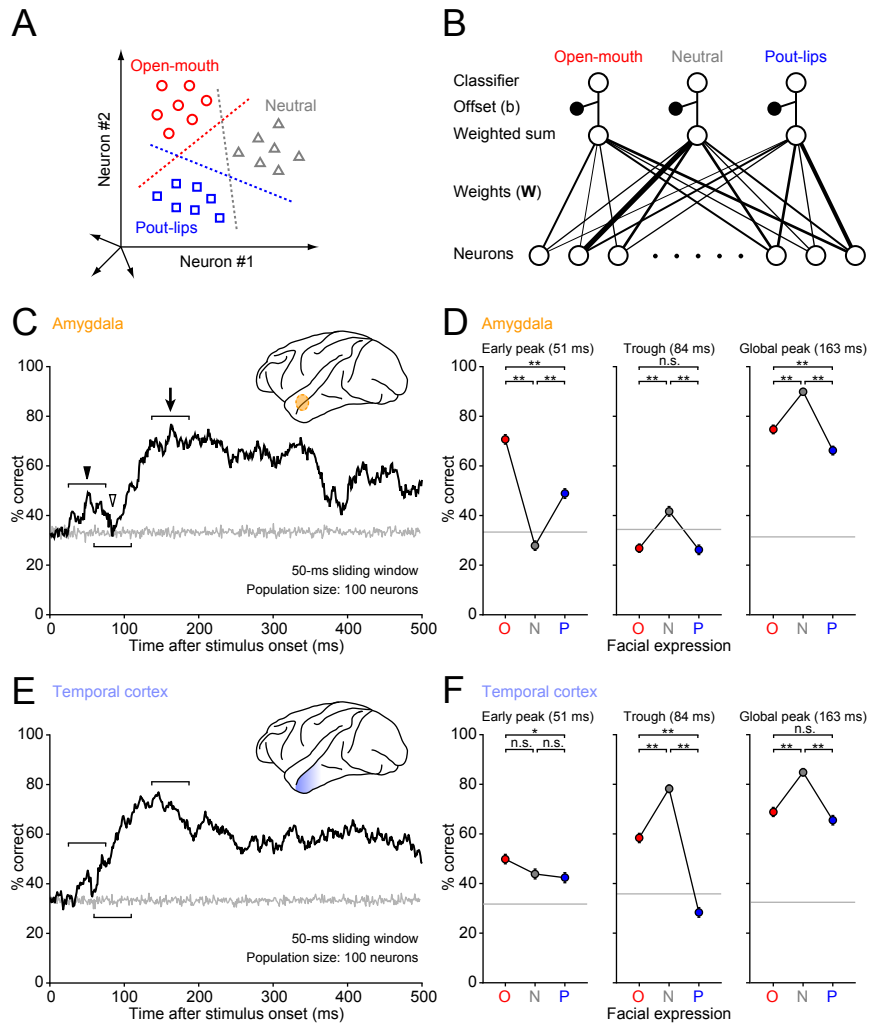

Inagaki & Fujita  
Figure 2



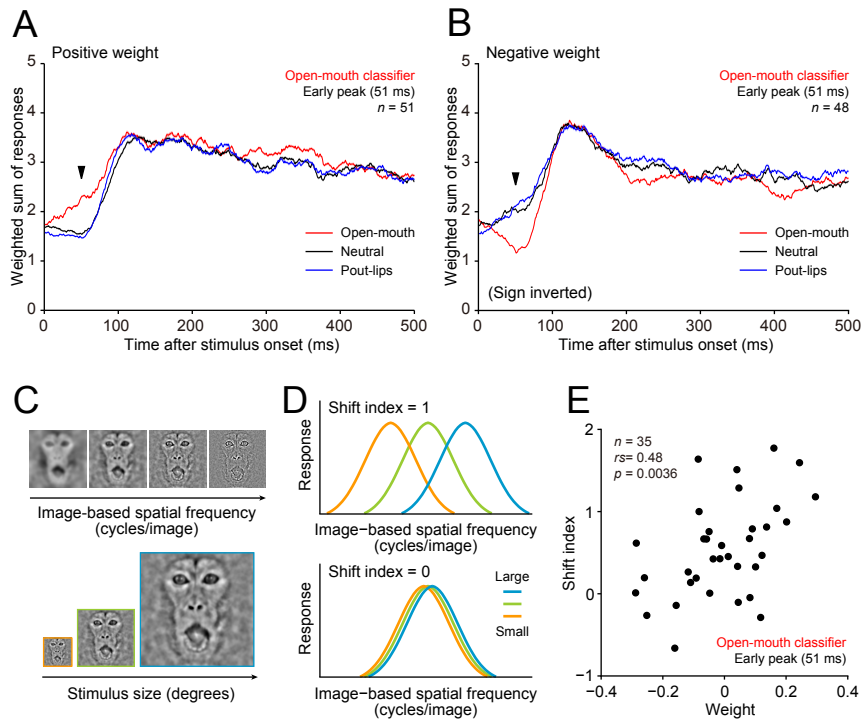

Inagaki & Fujita  
Figure 3

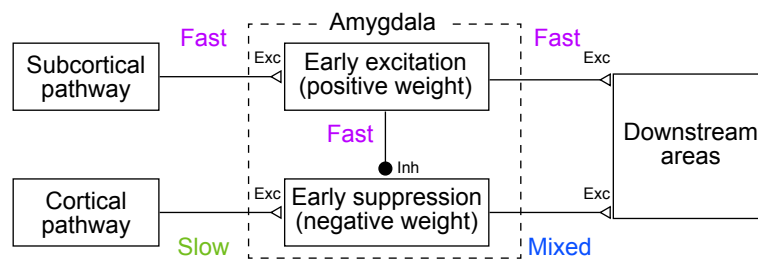

Inagaki & Fujita  
Figure 4

## Supplemental Information

### Supplemental Figures

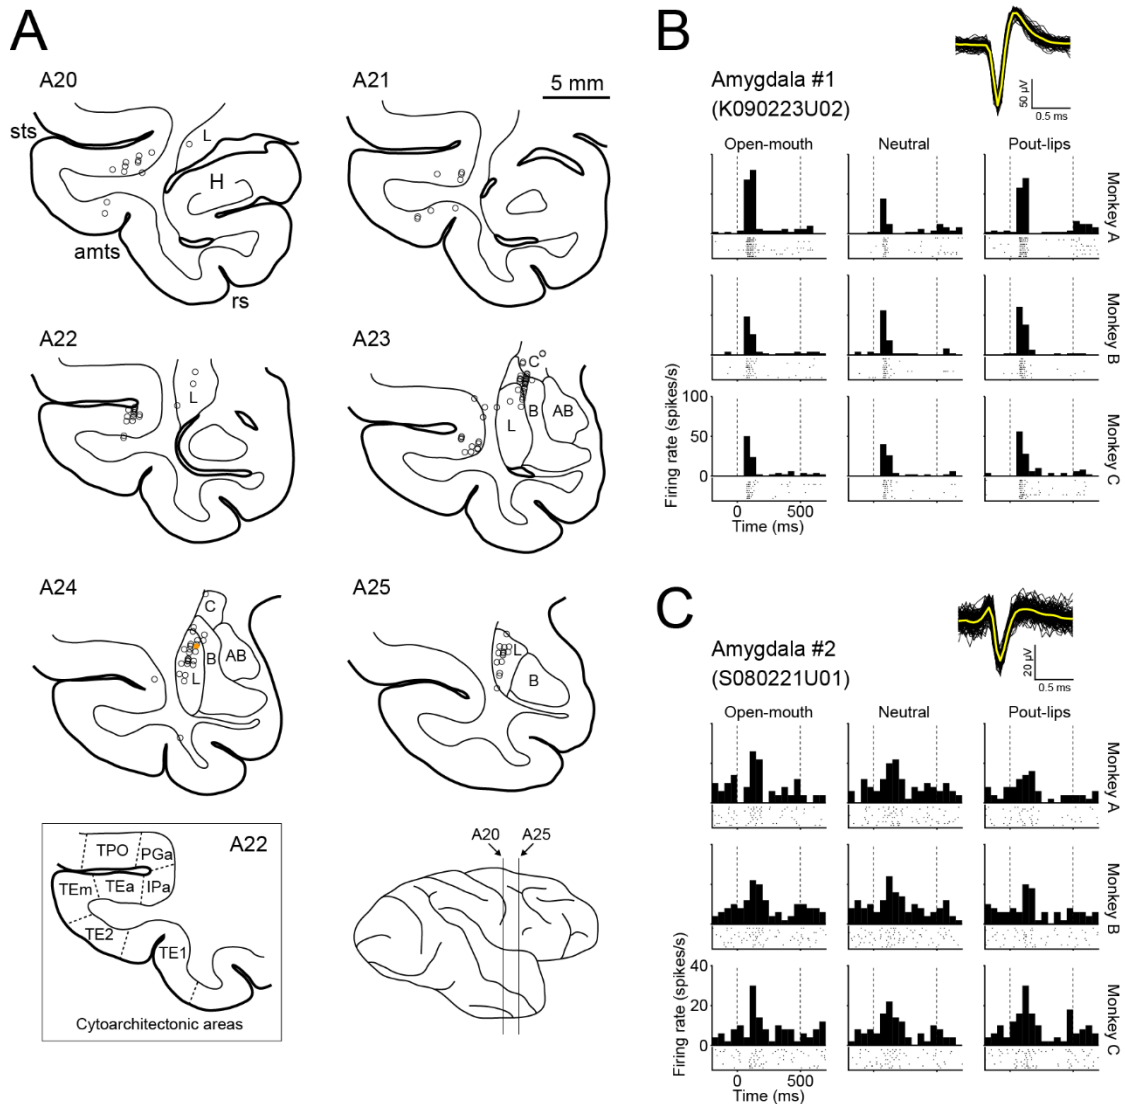

**Figure S1. Detailed information of the recorded neurons. Related to Figure 1.**

(A) Reconstructed recording sites in the right hemisphere of monkey S. Open circles represent recording sites where we recorded from face-responsive neurons. The recording sites were primarily in the lateral and basal nuclei of the amygdala and in deep portions of the upper and lower banks of the superior temporal sulcus. The filled orange circle at level A24 indicates the recording site of the example neuron shown in C, which was recorded from monkey S. *H*, hippocampus; *L*, lateral nucleus of the amygdala; *B*, basal nucleus of the amygdala; *AB*, accessory basal nucleus of the amygdala; *C*, central nucleus of the amygdala; *sts*, superior temporal sulcus; *amts*, anterior middle temporal sulcus; *rs*, rhinal sulcus. Cytoarchitectonic areas of the temporal cortex are based on [S1]. (B and C) Spike waveforms, raster plots, and peri-stimulus time histograms (PSTHs) of two example neurons in the amygdala. Insets; waveforms of spikes ( $n = 100$ ) are superimposed for each neuron. Yellow traces are mean waveforms averaged across the spikes. For raster plots and PSTHs, each panel corresponds to responses to each face image (the layout of the panels matches Fig. 1B).

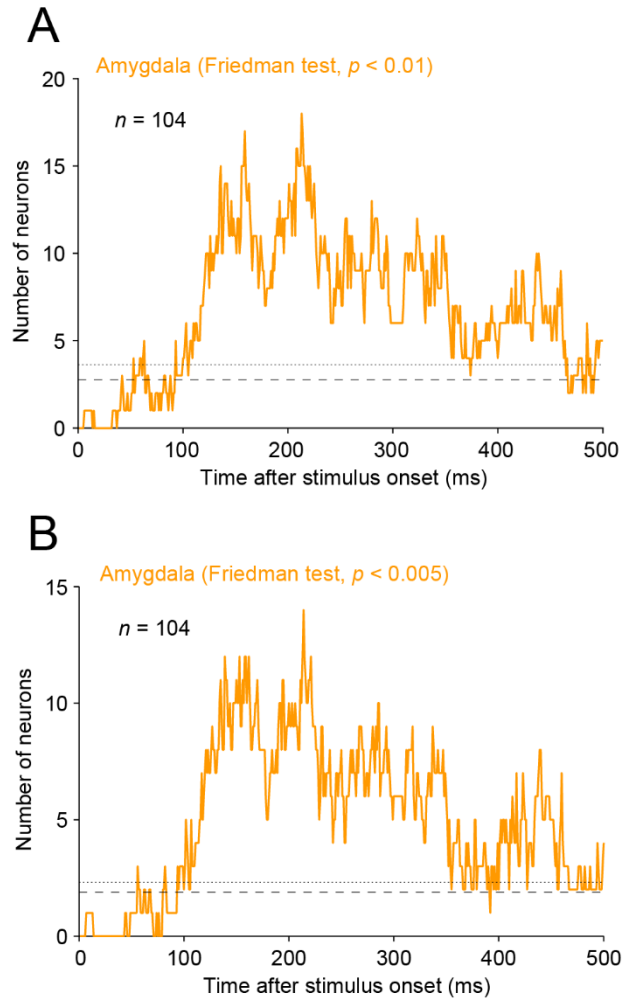

**Figure S2. Time course for the number of facial-expression selective neurons in the amygdala with criteria of  $p < 0.01$  (A) and  $p < 0.005$  (B). Related to Figure 1E.**

Conventions are the same as **Figure 1E**. Note that the statistical criteria of the Friedman test are 0.01 and 0.005 in this figure, while 0.05 was used in **Figure 1E**.

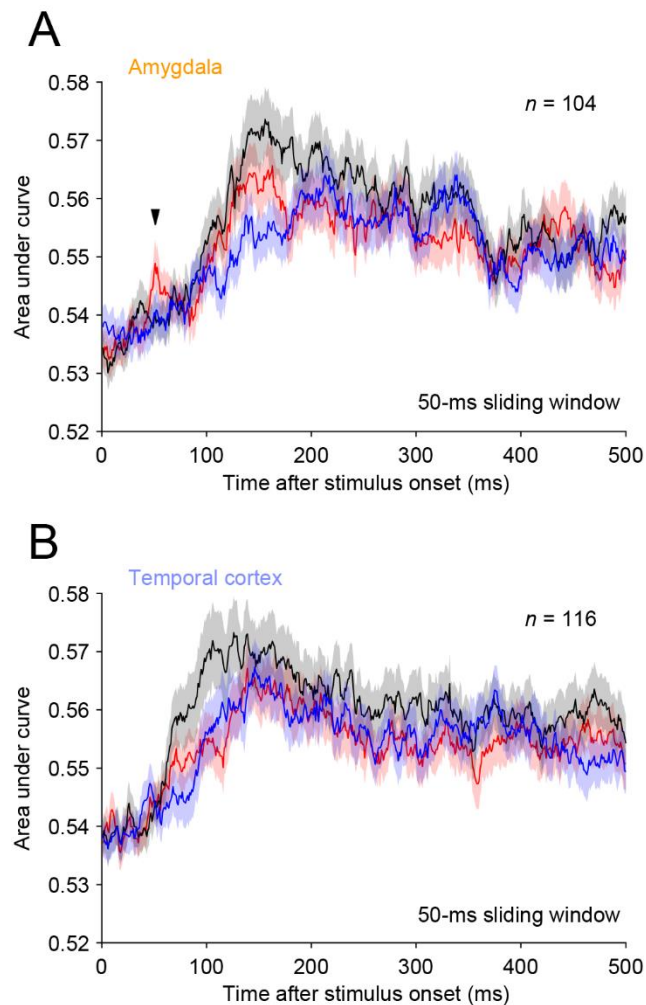

**Figure S3. Time course for changes in the area under curve (AUC) in the amygdala (A) and temporal cortex (B). Related to Figure 2C–2F.**

The AUC values calculated by the receiver-operating characteristic analysis represents the separation of two response distributions one for a single facial expression (red, open-mouth; black, neutral; blue, pout-lips) and the other for the other two facial expressions (mean  $\pm$  SEM). The arrowhead indicates the early peak window (51 ms).

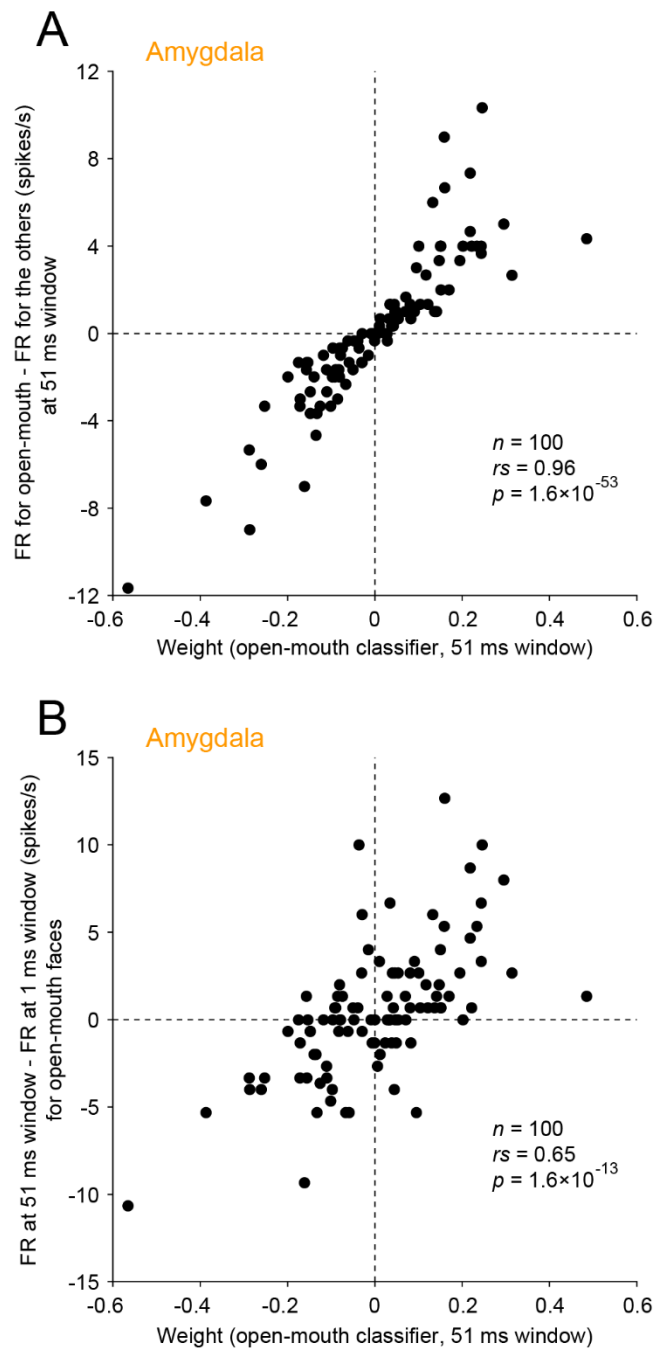

**Figure S4. Relationships between weight of the open-mouth classifier (51 ms window) and response properties of the amygdala neurons. Related to Figure 3.**

(A) Relationship between the weight and preference for open-mouth faces. Difference in mean firing rates (FRs) for open-mouth and the other faces was calculated at 51-ms time window (early peak) and plotted along the y-axis. (B) Relationship between the weight and firing increase/decrease relative to pre-stimulus levels. Difference in mean firing rates for open-mouth faces at 51-ms (early peak) and 1-ms time window (pre-stimulus level) is plotted along the y-axis.

### **Supplemental References**

- S1. Baylis, G.C., Rolls, E.T., and Leonard, C.M. (1987). Functional subdivisions of the temporal lobe neocortex. *J. Neurosci.* 7, 330–342.
